# Supplementary material for: Depression and anxiety in adolescents and young women with polycystic ovary syndrome: a systematic review and meta-analysis
Source: publisher site journal article supplement (doi:10.1515/ijamh-2022-0065), 2023-05-10
Supplement: Supplementary file 1 [file j_ijamh-2022-0065_suppl_001.docx]

**Search strategy:**

*Source of primary searches:* In order to achieve the objective of this study, a systematic literature search will be conducted in the electronical bibliographic databases including Emptree, PubMed, Scopus, Web of Science (WoS), Cochrane Library (Cochrane Center Register of Controlled Trials), and Google scholar from 1991/1/1 to January 2018/6/30. Gray literatures will be extracted from thesis and conference papers indexed in Scopus, Web of Science and ProQuest database and to find unpublished paper. We will also hand search two key journals according to Scopus report. References of the selected articles will be hand searched. We will not restriction for language.

**Key words and syntax:**

Key words selected according to medical subject headings (MeSH) and non-MeSH keywords:

“Ovary Syndrome”, Polycystic, Syndrome, “Polycystic Ovary”, “Stein-Leventhal Syndrome” , “Stein Leventhal Syndrome”, “Syndrome AND Stein-Leventhal”, “Sclerocystic Ovarian Degeneration”, “Ovarian Degeneration, Sclerocystic, “Sclerocystic Ovary Syndrome”, “Polycystic Ovarian Syndrome”, “Ovarian Syndrome, Polycystic, “Polycystic Ovary Syndrome 1”, “Sclerocystic Ovaries” , “Ovary, Sclerocystic”, “Sclerocystic Ovary”, in combination with other component “Depressions, “Depressive Symptoms” , “Depressive Symptom”, Symptom ,Depressive, Symptoms, Depressive, “Emotional Depression” , Depression AND Emotional, Depressions, Emotional, “Emotional Depressions”, Social Anxiety”, Anxieties AND Social, Anxiety, Social, “Social Anxieties”

The details of Pubmed syntax will be as mention below.

**PUBMED SYNTAX FREE TAG:**

("Polycystic ovarian syndrome" OR ("Ovary Syndrome" AND polycystic) OR (syndrome AND "Polycystic Ovary") OR stein "Leventhal Syndrome" OR "Stein Leventhal Syndrome" OR (syndrome AND stein-leventhal) OR "Sclerocystic Ovarian Degeneration" OR "cystic ovary" OR "multiple follicle cyst" OR "Ovary Polycystic Syndrome" OR (ovary AND polycystic) OR "Polycystic ovarian desease" OR "Polycystic ovary" OR "Polycystic ovary disease" OR "Syndrome Stein Leventhal") AND (depression OR "Depressive Symptom" OR (symptom AND depressive) OR "Emotional Depression" OR (depression AND emotional) OR (anxiety and depression) OR "quality of life") AND 1991/01/01:2018/01/30[dp]

ITEMS=424

NNR= 14.28

SCOPUS

(“Polycystic ovarian syndrome” OR (“Ovary Syndrome” AND Polycystic) OR (Syndrome AND “Polycystic Ovary”) OR (Stein-“Leventhal Syndrome”) OR (“Stein Leventhal Syndrome”) OR (Syndrome AND Stein-Leventhal) OR (“Sclerocystic Ovarian Degeneration”))

19,950 document results

AND

((Depressions) OR (“Depressive Symptoms”) OR (“Emotional Depression”) OR (Depression AND Emotional) OR (“Anxiety”) OR (Anxieties AND Social) OR (“Social Anxieties”) OR (Hypervigilance) OR (Nervousness) OR (“quality of life”))

872 document results

AND

((PUBYEAR > 1990 AND PUBYEAR < 2018) OR PUBDATETXT(January 2018))

(PUBYEAR > 1990 AND PUBYEAR < 2018) OR PUBDATETXT(January 2018)

WOS

(“Polycystic ovarian syndrome” OR (“Ovary Syndrome” AND Polycystic) OR (Syndrome AND “Polycystic Ovary”) OR (Stein-“Leventhal Syndrome”) OR (“Stein Leventhal Syndrome”) OR (Syndrome AND Stein-Leventhal) OR (“Sclerocystic Ovarian Degeneration”)) (1700 ITEMS)

AND

((Depressions) OR (“Depressive Symptoms”) OR (“Emotional Depression”) OR (Depression AND Emotional) OR (“Anxiety”) OR (Anxieties AND Social) OR (“Social A

nxieties”) OR (Hypervigilance) OR (Nervousness) OR (“quality of life”)) (72 ITEMS)

PY=(1991-2018)
